# Supplementary material
Source: Springer Nature journal article supplement (https://www.springermedizin.de/resource/supplementary/12889_2010_2901_MOESM2_ESM.pdf/9487616)

Figure 2. Current, high, and heavy alcohol use among African women by age

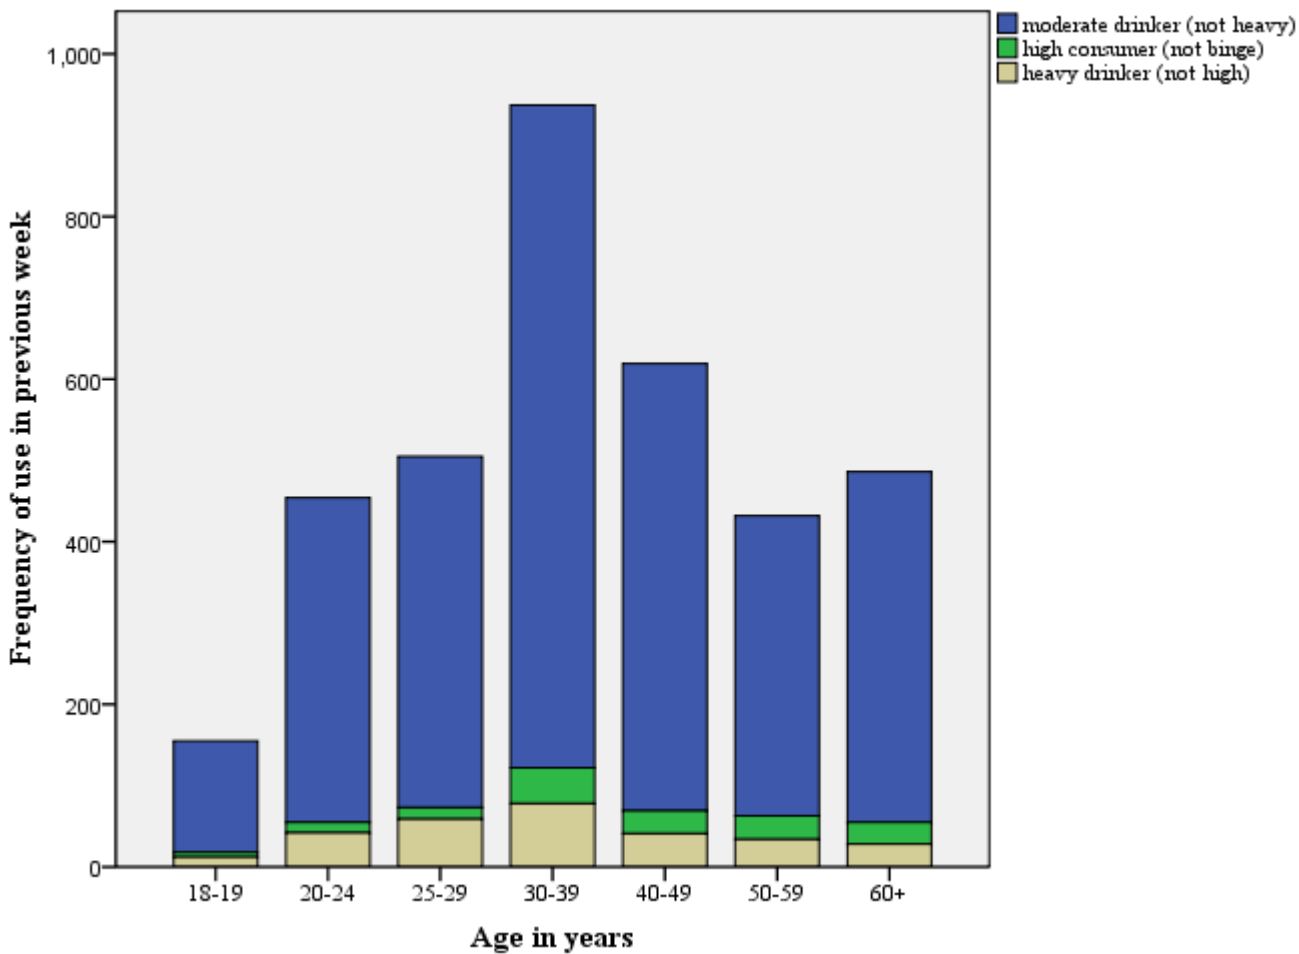

Supplement: MOESM2 [file 9487616]
